# Supplementary material for: Living-Donor Liver Transplantation for Hepatocellular Carcinoma: Impact of the MELD Score and Predictive Value of NLR on Survival
Source: MDPI journal article supplement (doi:10.3390/curroncol29060310), 2022-05-29
Supplement: s1 [file s1]

Supplemental table S1. Characteristics of enrolled 230 HCC patients received LDLT

| General information                | Mean±SD       | Number (%) or median | Minimum-maximum |
|------------------------------------|---------------|----------------------|-----------------|
| Recipient age, year-old            | 55.5±7.2      | 55.9                 | 32.8-70.3       |
| Sex, male                          |               | 186 (80.9%)          |                 |
| Viral hepatitis                    |               | 219 (95.2%)          |                 |
| Child-Pugh score                   | 7.7±2.2       | 8                    | 5-12            |
| MELD score                         | 12.9±5.7      | 12                   | 6-36            |
| NLR                                | 3.9±4.7       | 2.4                  | 0.5-29.2        |
| Locoregional treatment before LT   |               | 189 (82.2%)          |                 |
| Beyond UCSF criteria, radiology    |               | 19 (8.3%)            |                 |
| AFP, ng/dL, at LT                  | 136.7±361.2   | 13.7                 | 1.0-2525.0      |
| Recipient CMV IgG, positive        |               | 215 (93.5%)          |                 |
| Living donor liver transplantation |               |                      |                 |
| Donor age, year-old                | 30.5±8.5      | 29.1                 | 18.0-58.1       |
| Donor sex, male                    |               | 134 (58.3%)          |                 |
| Graft type, right liver            |               | 218 (94.8%)          |                 |
| GRWR, %                            | 0.95±0.18     | 0.94                 | 0.57-1.43       |
| Ascites amount, mL, intraoperative | 1137.3±2463.9 | 0                    | 0-13800         |
| Blood loss, mL, intraoperative     | 2041.3±2582.9 | 1375                 | 50-23400        |
| Explant pathology                  |               |                      |                 |
| Tumor size, cm (maximum)           | 2.7±1.5       | 2.4                  | 0.5-11.2        |
| Tumor size, cm (summation)         | 4.9±3.6       | 3.6                  | 0.5-19.5        |
| Tumor number                       | 2.7±2.7       | 2                    | 1-20            |
| Satellite nodule                   |               | 20 (8.7%)            |                 |
| Microvascular invasion             |               | 40 (17.4%)           |                 |
| Tumor capsulation                  |               | 164 (71.3%)          |                 |
| Capsule invasion                   |               | 100 (43.5%)          |                 |

|                                 |            |
|---------------------------------|------------|
| Histology grade, $\geq$ III     | 54 (23.5%) |
| Beyond UCSF criteria, pathology | 63 (27.4%) |

---

Abbreviation: HCC, hepatocellular carcinoma; LDLT, living donor liver transplantation; SD, standard deviation; HBV, hepatitis B virus; HCV, hepatitis C virus; MELD, model of end-stage liver disease; NLR, neutrophil-to-lymphocyte ratio; UCSF, university of California San Francisco; AFP, alpha-fetoprotein; CMV IgG, cytomegalovirus Immunoglobulin G; GRWR, graft-to-recipient weight ratio.

Supplemental table S2. Univariate analyses for pre-operative factors to predict survival in HCC patients after LDLT using cox regression model

| Parameters                       | HR    | 90%CI      | <i>p</i> -value |
|----------------------------------|-------|------------|-----------------|
| Recipient age, year-old          | 0.99  | 0.97-1.02  | 0.545           |
| Recipient age $\geq$ 60-year-old | 1.16  | 0.80-1.69  | 0.504           |
| Sex, male                        | 0.80  | 0.52-1.21- | 0.366           |
| HBV                              | 1.02  | 0.70-1.50  | 0.923           |
| HCV                              | 1.13  | 0.78-1.64  | 0.602           |
| Child-Pugh score                 | 1.07  | 0.96-1.19  | 0.316           |
| Child-Pugh class, C              | 1.34  | 0.79-2.28  | 0.368           |
| MELD score                       | 1.03  | 0.99-1.06  | 0.116           |
| MELD score $\geq$ 20             | 1.76  | 1.08-2.89  | 0.059           |
| NLR                              | 1.02  | 0.99-1.05  | 0.219           |
| NLR $\geq$ 5                     | 1.47  | 0.97-2.24  | 0.129           |
| Locoregional treatment before LT | 0.74  | 0.50-1.11  | 0.220           |
| Beyond UCSF criteria, radiology  | 1.25  | 0.68-2.30  | 0.545           |
| AFP, ng/dL                       | 1.00  | 0.99-1.01  | 0.832           |
| AFP $\geq$ 200 ng/mL             | 1.15  | 0.55-2.40  | 0.753           |
| Recipient CMV IgG, positive      | 0.327 | 0.10-1.07  | 0.120           |
| Donor/graft information          |       |            |                 |
| Donor age, year-old              | 1.01  | 0.99-1.03  | 0.511           |
| Donor age $\geq$ 45-year-old     | 0.525 | 0.20-1.38  | 0.273           |
| Donor Sex, male                  | 0.864 | 0.61-1.23  | 0.496           |
| Graft type, right liver          | 0.680 | 0.34-1.36  | 0.362           |

Abbreviation: HCC, hepatocellular carcinoma; LDLT, living donor liver transplantation; HR, hazard ratio; CI, confidence interval; HBV, hepatitis B virus; HCV, hepatitis C virus; MELD, model of end-stage liver disease; NLR, neutrophil-to-lymphocyte ratio; UCSF, university of California San Francisco;

---

AFP, alpha-fetoprotein; CMV IgG, cytomegalovirus Immunoglobulin G;  
GRWR, graft-to-recipient weight ratio.

Supplemental table S3. Uni-/multivariate analyses for different infectious status to predict overall survival in HCC patients after LDLT using cox regression model by backward selection (likelihood ratio)

|                      | Univariate |            |                 | Multivariate |            |                 |
|----------------------|------------|------------|-----------------|--------------|------------|-----------------|
|                      | HR         | 90%CI      | <i>p</i> -value | HR           | 90%CI      | <i>p</i> -value |
| CMV disease          | 2.56       | 1.61-4.07  | <0.001          |              |            |                 |
| Severe CMV infection | 6.39       | 3.51-11.64 | <0.001          |              |            |                 |
| Post-LT infection    | 2.05       | 1.38-3.15  | 0.001           | 1.52         | 0.94-2.47  | 0.088           |
| Septic shock         | 7.57       | 4.62-12.40 | <0.001          | 5.80         | 3.28-10.26 | <0.001          |

Abbreviation: HCC, hepatocellular carcinoma; LDLT, living donor liver transplantation; HR, hazard ratio; CI, confidence interval; CMV, cytomegalovirus.
